# Supplementary material for: Asymmetric sulfur ylide based enantioselective synthesis of D-erythro-sphingosine
Source: Royal Society of Chemistry journal article supplement (doi:10.1039/b814882a), 2008-01-01

**Supporting Information**

**Asymmetric Sulfur Ylide Based Enantioselective Synthesis of D-*erythro*-sphingosine.**

José Antonio Morales-Serna, Josep Llaveria, Yolanda Díaz, M. Isabel Matheu,  
Sergio Castellón\*

*Departamento de Química Analítica y Química Orgánica, Universitat Rovira i Virgili,  
C/Marcel·li Domingo s/n, 43007 Tarragona, (Spain)*

[sergio.castillon@urv.net](mailto:sergio.castillon@urv.net)

|                            |       |
|----------------------------|-------|
| 1. General methods         | S1    |
| 2. Experimental Procedures | S2-S4 |
| 3. NMR Spectra             | S5-S8 |

**General methods**

All reactions were conducted under a dried argon stream. Solvents (CH<sub>2</sub>Cl<sub>2</sub> 99.9%, toluene 99.9%) were purchased in capped Pure Solv System-4<sup>®</sup> bottles and used without further purification and stored under argon. Yields refer to the chromatographically and spectroscopically (<sup>1</sup>H and <sup>13</sup>C) homogeneous materials, unless otherwise stated. All glassware utilized was flame-dried before use. Reactions were monitored by TLC carried out on 0.25 mm E. Merck silica gel plates. Developed TLC plates were visualized under a short-wave UV lamp and by heating plates that were dipped in ethanol/H<sub>2</sub>SO<sub>4</sub> (15:1) and basic solution of permanganate potassium. Flash column chromatography (FCC) was performed using flash silica gel (32–63 μm) and employed a solvent polarity correlated with TLC mobility. Melting points, determined with Reichert apparatus, are uncorrected. Optical rotations were measured at 598 nm on a Jasco DIP-370 digital polarimeter using a 100 mm cell. NMR experiments were conducted on a Varian 400 MHz instrument using CDCl<sub>3</sub> (99.9% D) as the solvent, with chemical shifts (δ) reference to internal standards CDCl<sub>3</sub> (7.26 ppm <sup>1</sup>H, 77.23 ppm <sup>13</sup>C) or Me<sub>4</sub>Si as an internal reference (0.00 ppm)

Chemical shifts are relative to the deuterated solvent peak and are in parts per million (ppm).

### Experimental Procedures

**(E)-1-bromohexadec-2-ene (6).** Allyl bromide (**8**) (240 mg, 2 mmol) was dissolved in 40 mL of dry CH<sub>2</sub>Cl<sub>2</sub> and then pentadec-1-ene **9** (1.68 g, 8 mmol) and Grubs catalyst **B** (8 mg, 2%) were added at room temperature. After the addition was completed, the reaction mixture was kept boiling for 8 h under argon atmosphere and then cooled to room temperature and concentrated *in vacuo*. The residue was purified by flash column chromatography on silica gel using hexane-AcOEt (98:2) as the eluent to give 590 mg of pure 1-bromohexadec-2-ene (**6**) (97 %) as colourless oil and with *E:Z* selectivity of 52:1. TLC (Hexane) *R<sub>f</sub>* 0.60; <sup>1</sup>H NMR (400 MHz, CDCl<sub>3</sub>): δ 5.78 (1H, dt, *J*=14.8, 7.6 Hz), 5.68 (1H, dt, *J*=14.8, 7.2 Hz), 3.96 (2H, d, *J*=7.6 Hz), 2.03 (2H, q, *J*=7.2, Hz), 1.34-1.20 (22H, m), 0.86 (3H, t, *J*=6.9 Hz); <sup>13</sup>C NMR (100.6 MHz, CDCl<sub>3</sub>): δ 137, 126.3, 34, 32.3, 32.1, 29.8, 29.6, 29.5, 29.3, 29, 22.9, 14.3. Anal. Calcd. for C<sub>16</sub>H<sub>31</sub>Br: C, 63.36; H, 10.30. Found: C, 63.34; H, 10.31.

**Formylmethyl benzylcarbamate (10).** To a solution of 2-hydroxyacetaldehyde **7** (184 mg, 3.06 mmol) in 20 mL of dry Et<sub>2</sub>O freshly distilled Et<sub>3</sub>N (10.16 mmol) and BnNCO (647 mg, 4.8 mmol) were added. The resulting mixture was heated to 60 °C in a sealed tube for 17 h, cooled to room temperature and quenched with saturate NH<sub>4</sub>Cl (10 mL). The phases were separated and the aqueous layer was extracted with CH<sub>2</sub>Cl<sub>2</sub> (2 x 10 mL). The organic layer was dried over MgSO<sub>4</sub> and concentrated *in vacuo*. The residue was purified by flash column chromatography on silica gel using hexane-AcOEt (85:15) as the eluent to give 580 mg of pure formylmethyl benzylcarbamate (**10**) (98 %) as an oil. TLC (Hexane-AcOEt 80:20) *R<sub>f</sub>* 0.70; <sup>1</sup>H NMR (400 MHz, CDCl<sub>3</sub>): δ 9.67 (1H, t, *J*=0.7 Hz), 7.35-7.21 (5H, m), 5.08 (1H, br s), 4.89 (2H, d, *J*=0.7 Hz) 4.4 (2H, d, *J*=5.5); <sup>13</sup>C NMR (100.6 MHz, CDCl<sub>3</sub>): δ 194.2, 153.6, 136.9, 128.5, 124.4, 121.6, 69.5, 45.2. Anal. Calcd. For C<sub>10</sub>H<sub>11</sub>NO<sub>3</sub>: C, 62.17; H, 5.74; N, 7.25. Found: C, 62.15; H, 5.75; N, 7.26.

**Sulfonium salt 12.** To a rapidly stirred solution of chiral sulfide **11** (500 mg, 2.0 mmol) and (*E*)-1-bromohexadec-2-ene (909 mg, 3.0 mmol) in 2 mL dichloromethane was added silver tetrafluoroborate (778 mg, 4.0 mmol) in the dark under an argon atmosphere at room temperature. The reaction was stirred for 48 h and 10 mL of CH<sub>2</sub>Cl<sub>2</sub> was added. Silver bromide precipitate was filtered and the filtrate was concentrated *in vacuo*. The residual brown oil was recrystallized from CH<sub>2</sub>Cl<sub>2</sub> and Et<sub>2</sub>O to give sulfonium salt **12** as a white precipitate which was used directly into the next step.

**((2*R*,3*R*)-3-((*E*)-pentadec-1-enyl)oxiran-2-yl)methyl benzylcarbamate (13).** To a stirred solution of sulfonium salt **12** (465 mg, 0.83 mmol) in 5 mL of CH<sub>2</sub>Cl<sub>2</sub> *N,N,N',N''*-tetramethyl-*N''*-[tris(dimethylamino)phos-phoralidene]phosphoric triamide ethylimine (415 mg, 1.22 mmol) was added at -78 °C under argon. After 30 min, a mixture of 20 mL of CH<sub>2</sub>Cl<sub>2</sub> and formylmethyl benzylcarbamate **10** (240 mg, 1.25 mmol) was added to the solution. The reaction mixture was stirred for 2 h and then was warmed up to room temperature and a saturated NaCl solution (10 mL) was added. The phases were separated and the aqueous layer was extracted with AcOEt (2 x 10 mL). The organic layer was dried over MgSO<sub>4</sub> and concentrated *in vacuo*. The residue was purified by flash column chromatography on silica gel using hexane-AcOEt (85:15) as the eluent to give 192 mg of pure epoxide **13** (60 %). Compound **11** (180 mg, 87% was also recovered). TLC (Hexane-AcOEt 70:30) *R*<sub>f</sub> 0.60; [α]<sub>D</sub> +15.0 (*c* 0.5 in CHCl<sub>3</sub>); <sup>1</sup>H NMR (400 MHz, CDCl<sub>3</sub>): δ 7.37-7.26 (5H, m), 5.73 (1H, dt, *J*=14.8, 6.5 Hz), 5.10 (1H, dd, *J*=14.8, 9.1 Hz), 5.01 (1H, br s), 4.47 (1H, dd, *J*=12.2, 3.1 Hz), 4.39 (2H, d, *J*=6), 4.05 (1H, dd, *J*=12.2, 6.3 Hz), 3.30 (1H, dd, *J*=9.1, 2.4), 3.15 (1H, ddd, *J*=6.3, 3.1, 2.4 Hz), 2.03 (2H, q, *J*=6.5 Hz), 1.37-1.20 (22H, m), 0.81 (3H, t, *J*=6.8 Hz); <sup>13</sup>C NMR (100.6 MHz, CDCl<sub>3</sub>): δ 156.0, 138.4, 134.6, 128.8, 127.7, 127.6, 120.3, 64.9, 57.6, 56.5, 45.2, 32.5, 32.1, 29.8, 29.6, 29.5, 29.4, 29.3, 22.8, 14.3. Anal. Calcd. for C<sub>26</sub>H<sub>41</sub>NO<sub>3</sub>: C, 75.14; H, 9.94; N, 3.37. Found: C, 75.12; H, 9.95; N, 3.36.

**(*S*)-4-((*R,E*)-1-hydroxyhexadec-2-enyl)oxazolidin-2-one (14).** To a stirred solution of epoxide **13** (220 mg, 0.57 mmol) in 5 mL of THF at -15 °C was added dropwise NaHMDS (0.57 mmol, 1 M in THF). The resulting mixture was slowly allowed to reach 0 °C (5 h)

and then quenched by addition of a saturate solution of  $\text{NH}_4\text{Cl}$  (10 mL). The phases were separated and the aqueous layer was extracted with AcOEt (2 x 10 mL). The organic layer was dried over  $\text{MgSO}_4$  and concentrated *in vacuo*. The residue was used directly into next step. Thus, to a stirred mixture of Li (excess) and freshly  $\text{EtNH}_2$  (15 mL) under argon at  $-78\text{ }^\circ\text{C}$  was added a solution of first residue in dry 2 mL of  $\text{Et}_2\text{O}$  *via* syringe. The reaction mixture was stirred at  $-78\text{ }^\circ\text{C}$  for 4 h and then carefully quenched with saturate  $\text{NH}_4\text{Cl}$ . The phases were separated and the aqueous layer was extracted with AcOEt (2 X 10 mL). The organic layer was dried over  $\text{MgSO}_4$  and concentrated *in vacuo*. The residue was purified by flash column chromatography on silica gel using hexane-AcOEt-MeOH (85:10:5) as the eluent to give 154 mg of pure oxazolidinone **14** (82 %). TLC (Hexane-AcOEt-MeOH 60:30:10)  $R_f$  0.70; m.p. 71-73  $^\circ\text{C}$ ;  $[\alpha]_D -1.3$  (*c* 1.75 in  $\text{CHCl}_3$ );  $^1\text{H}$  NMR (400, MHz,  $\text{CDCl}_3$ ):  $\delta$  5.82 (1H, dtd,  $J=15.4, 6.8, 0.8$  Hz), 5.46 (1H, br s), 5.37 (1H, ddt,  $J=15.4, 6.8, 1.2$  Hz), 4.41 (1H, dd,  $J=8.8, 8.5$  Hz), 4.31 (1H, dd,  $J=8.8, 4.9$  Hz), 4.06 (1H, dd,  $J=6.8, 5.2$  Hz), 3.82 (1H, ddd  $J=8.5, 5.2, 4.9$  Hz), 2.18 (1H, br s), 2.04 (2H, q,  $J=7.0$  Hz), 1.37-1.2 (22H, m), 0.81 (3H, t,  $J=6.7$  Hz);  $^{13}\text{C}$  NMR (100.6 MHz,  $\text{CDCl}_3$ ):  $\delta$  160.5, 136.6, 126.6, 73.3, 66.4, 56.4, 32.5, 32.1, 29.81, 29.79, 29.74, 29.6, 29.5, 29.4, 29.1, 22.8, 14.2. Anal. Calcd. For  $\text{C}_{19}\text{H}_{35}\text{NO}_3$ : C, 70.11; H, 10.84; N, 4.30. Found: C, 70.19; H, 10.80; N, 4.32.

**D-erythro-sphingosine (1).** The mixture of oxazolidinone **14** (32.5 mg, 0.1 mmol) and 1 M KOH (2 mL,  $\text{H}_2\text{O}:\text{EtOH}$  1:1) was heated to reflux for 2.5 h, cooled to room temperature and then 2 M HCl (10 mL) was added. The mixture was extracted with EtOAc (3 x 20 mL) and the combined organic layers were dried over  $\text{MgSO}_4$  and concentrated *in vacuo* giving 30 mg of pure *D-erythro-sphingosine (1)* (100 %). TLC (Hexane-AcOEt-MeOH 60:30:10)  $R_f$  0.70; m.p. 72-74  $^\circ\text{C}$ ;  $[\alpha]_D -1.6$  (*c* 1 in  $\text{CHCl}_3$ );  $^1\text{H}$  NMR (400, MHz,  $\text{CDCl}_3$ ):  $\delta$  5.76 (dtd, 1H,  $J=15.4, 6.7, 1.2$  Hz), 5.47 (ddt, 1H,  $J=15.4, 7.2, 1.6$  Hz), 4.04 (dd, 1H,  $J=7.2, 6$  Hz), 3.70 (dd, 1H,  $J=10.8, 4.8$  Hz), 3.61 (dd, 1H,  $J=10.8, 6$  Hz), 2.88 (ddd, 1H, 6, 6, 4.8), 2.05 (td, 2H,  $J=7.6, 6.7$  Hz), 1.74 (4H, br s), 1.37 (m, 2H), 1.20-1.40 (m, 20H), 0.88 (t, 3H,  $J=6.8$  Hz);  $^{13}\text{C}$  NMR (100.6 MHz,  $\text{CDCl}_3$ ):  $\delta$  135.1, 129.4, 75.8, 64.5, 56.3, 32.5, 32.1, 29.9, 29.8, 29.6, 29.5, 29.4, 29.3, 22.9, 14.3. Anal. Calcd. For  $\text{C}_{18}\text{H}_{37}\text{NO}_2$ : C, 72.19; H, 12.45; N, 4.68. Found: C, 72.21; H, 12.41; N, 4.70.

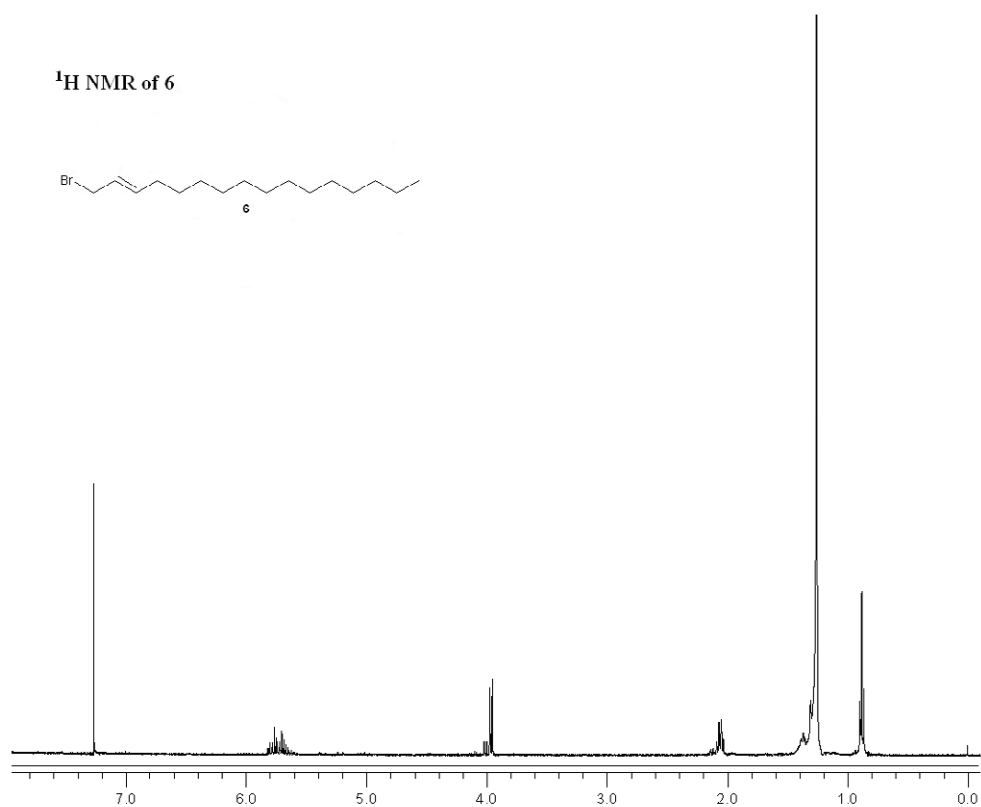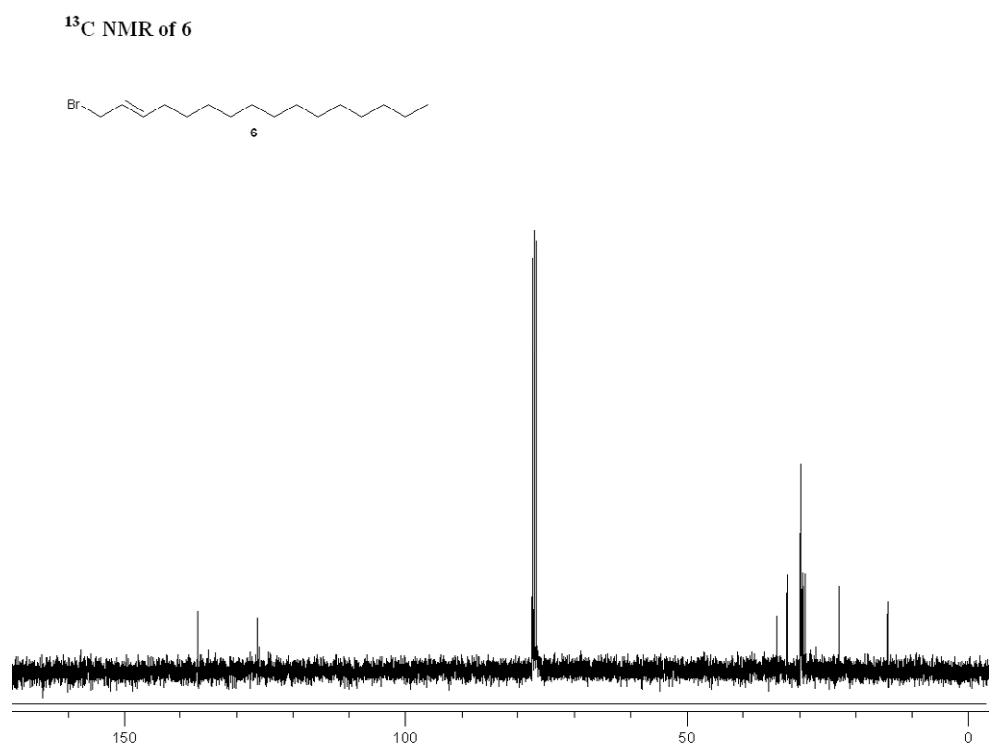

**<sup>1</sup>H NMR of 10**

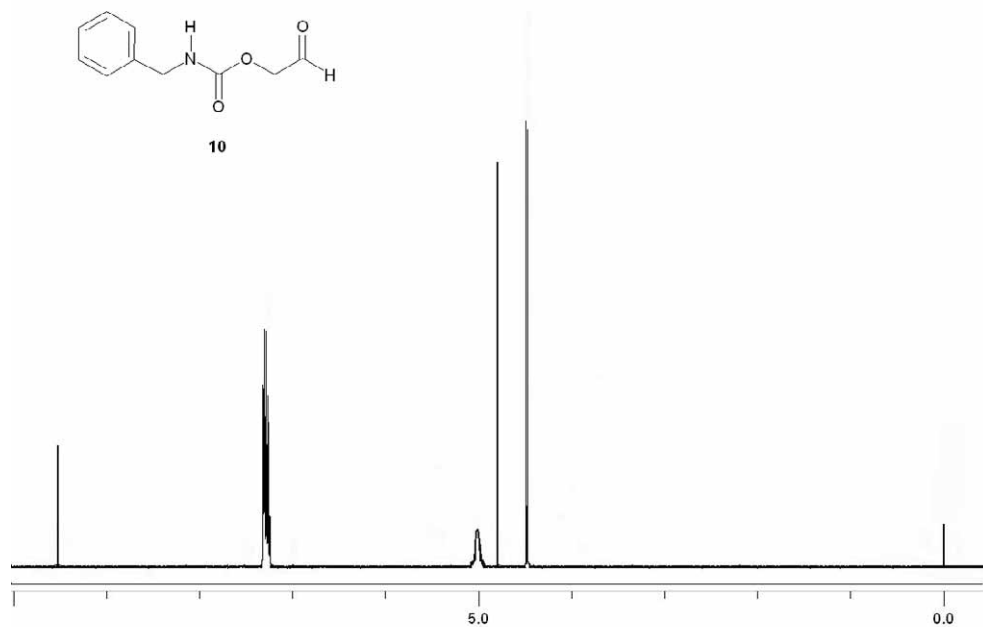

**<sup>13</sup>C NMR of 10**

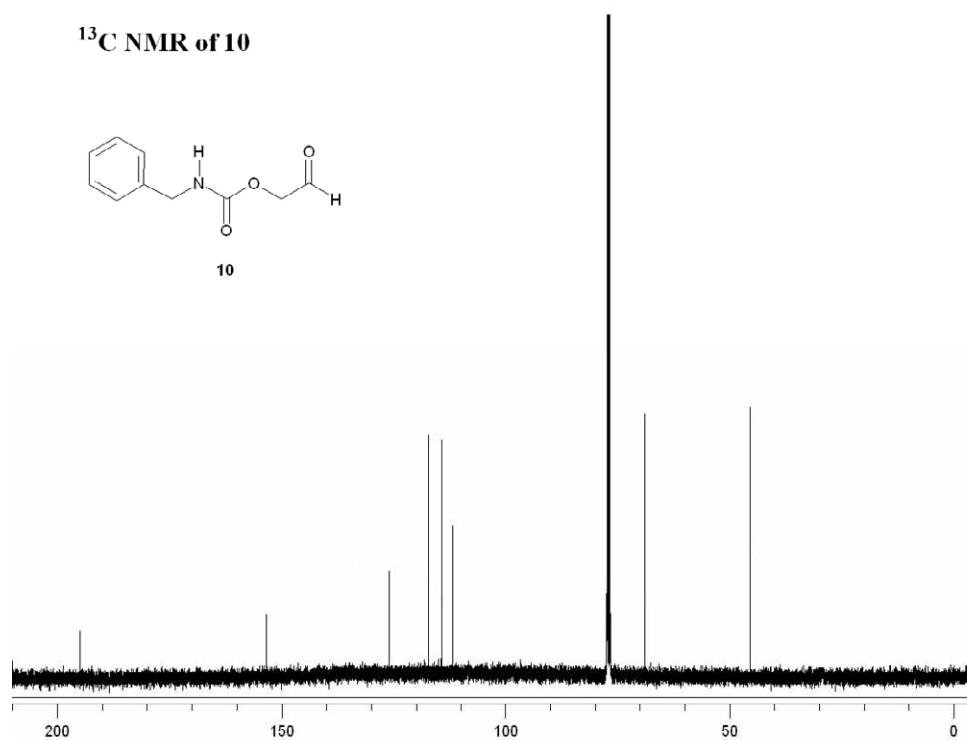

**$^1\text{H}$  NMR of 13**

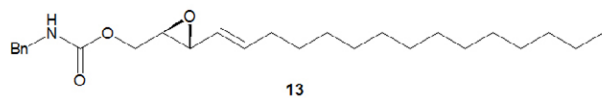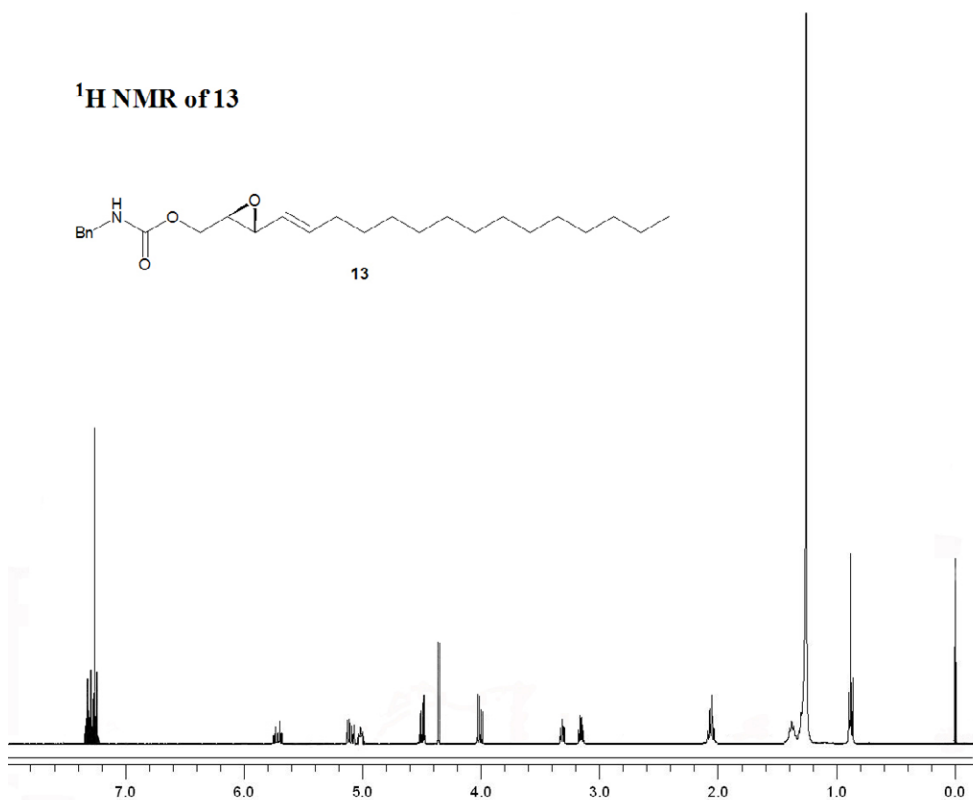

**$^{13}\text{C}$  NMR of 13**

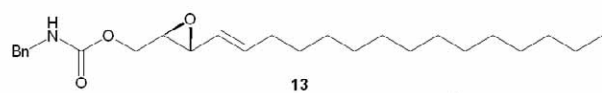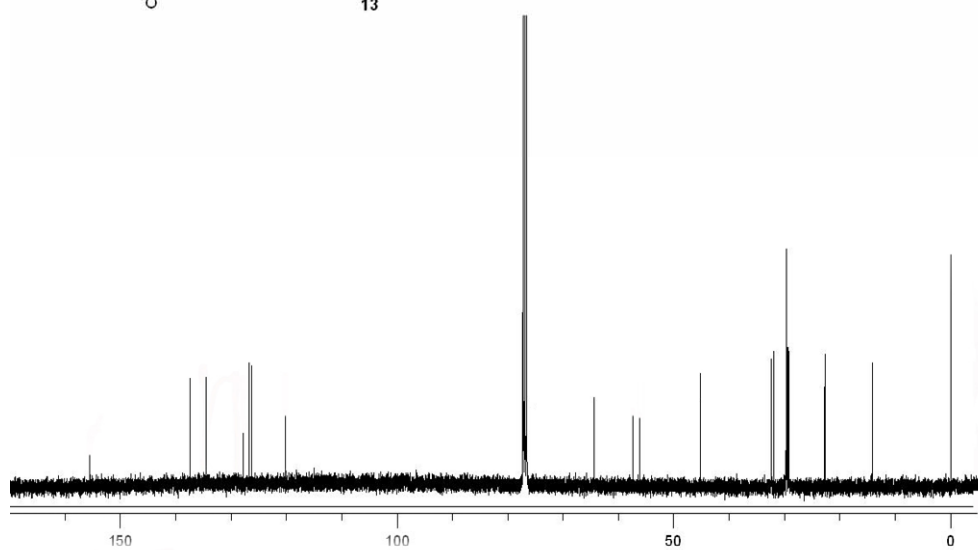

**$^1\text{H}$  NMR of 1**

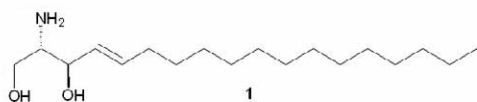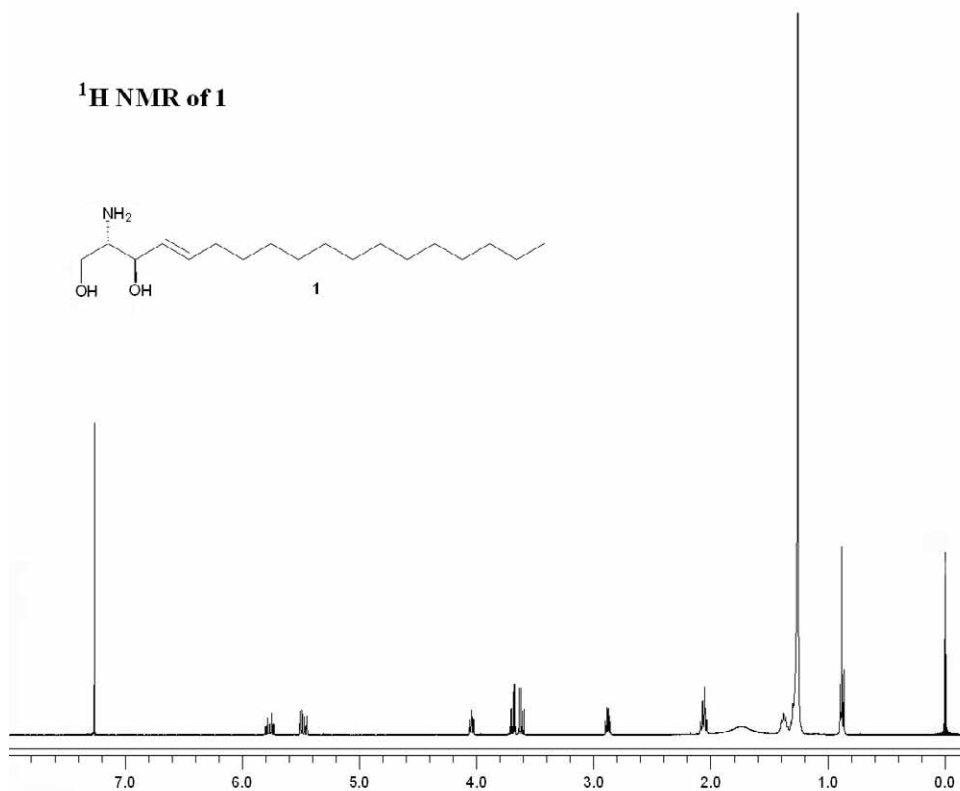

**$^{13}\text{C}$  NMR of 1**

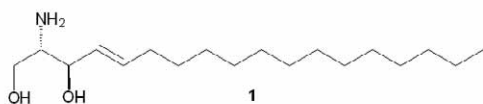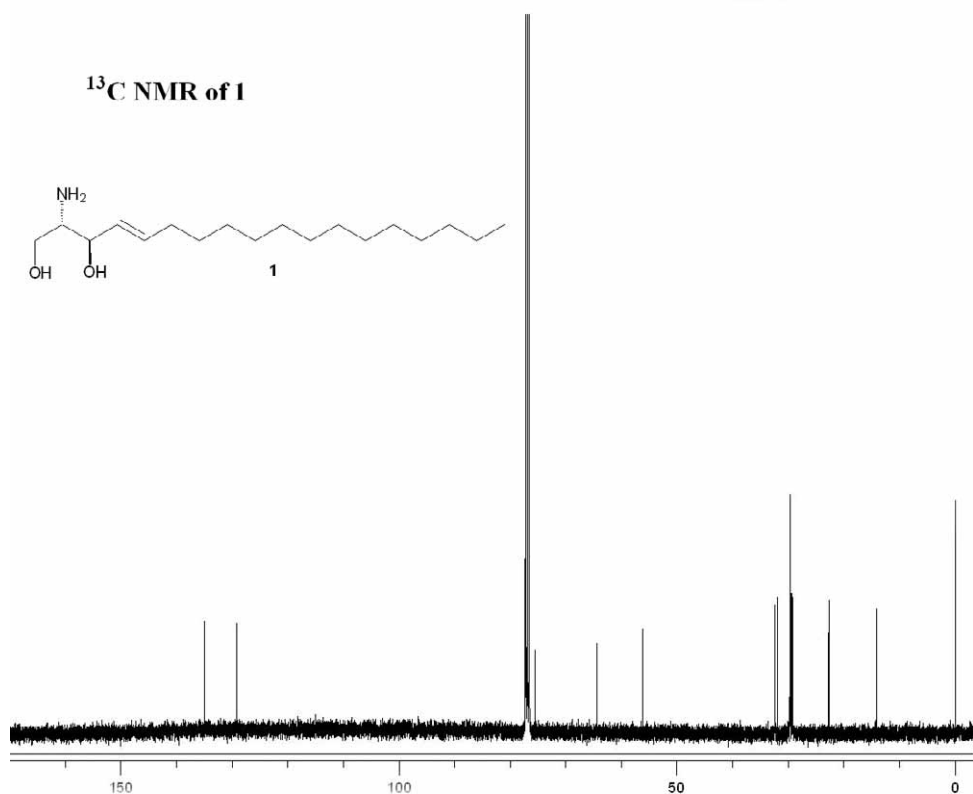

Supplement: b814882a.pdf [file b814882a.pdf]
